# Supplementary material
Source: PubMed Central journal article supplement (PMC7212526)
Supplement: NIHMS1568883-supplement-4.pdf [file NIHMS1568883-supplement-4.pdf]

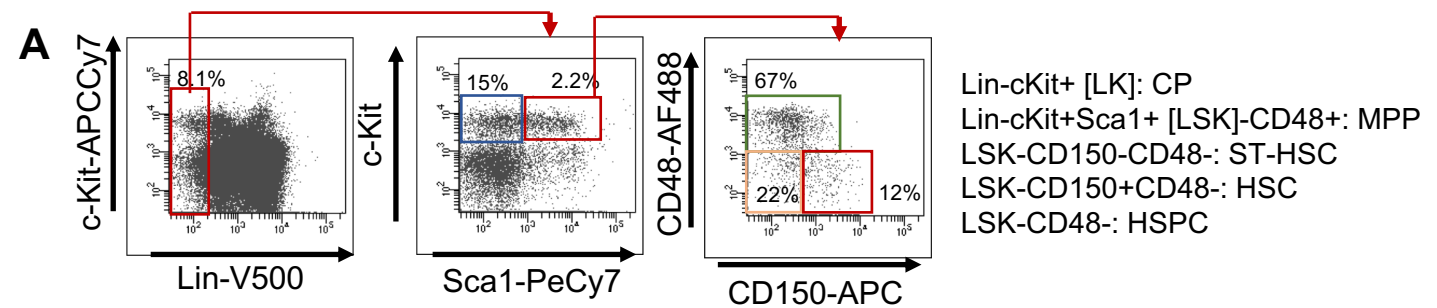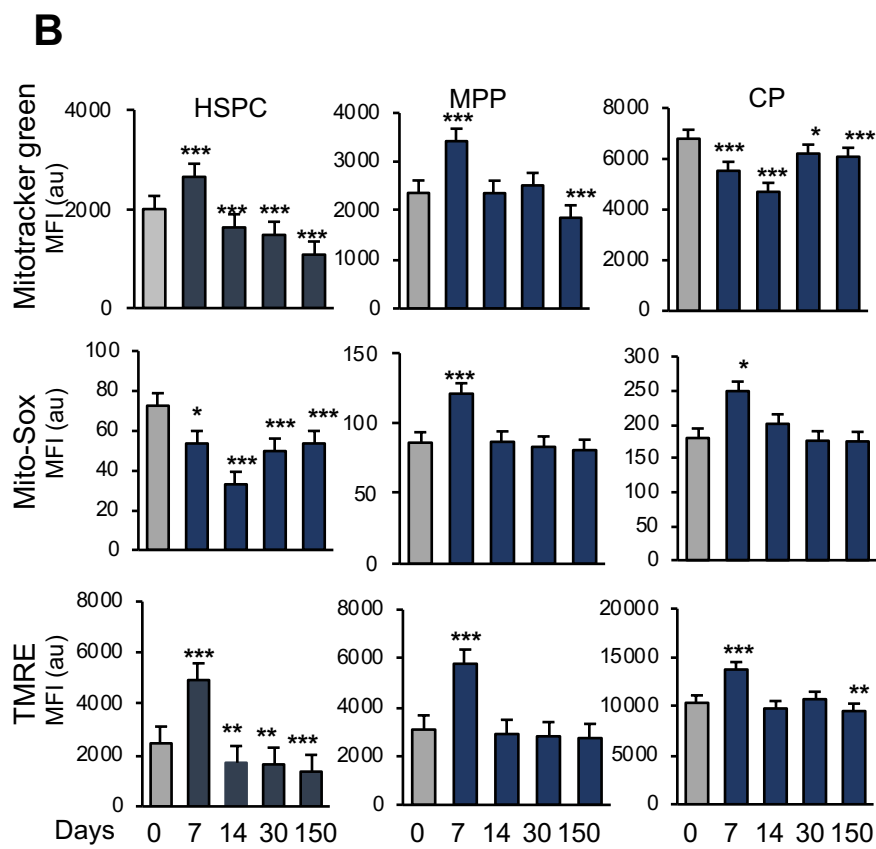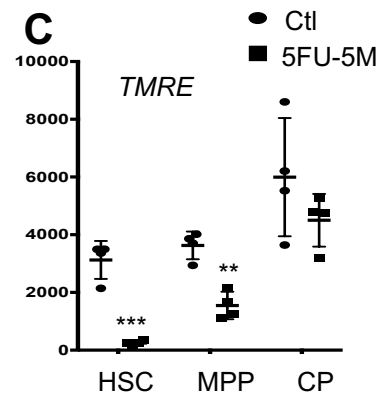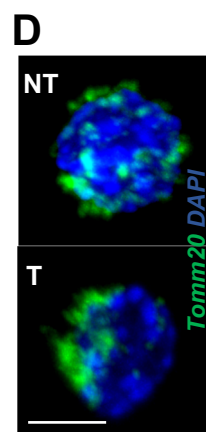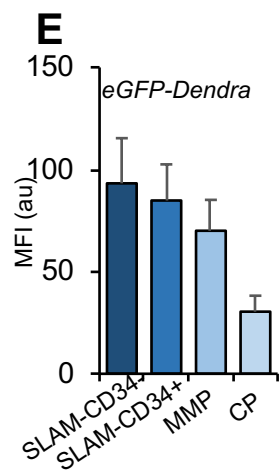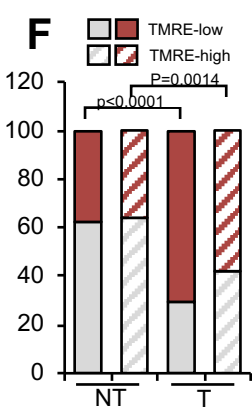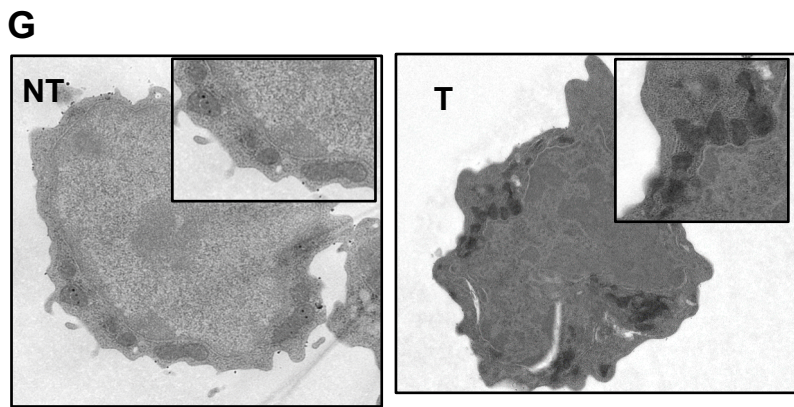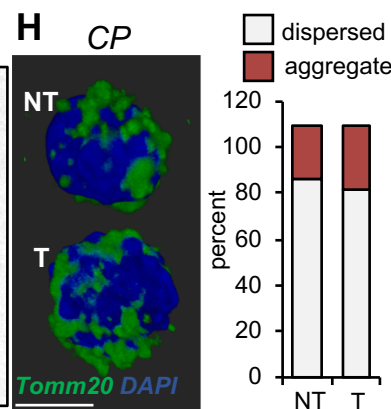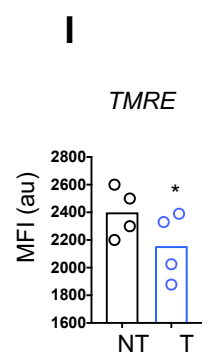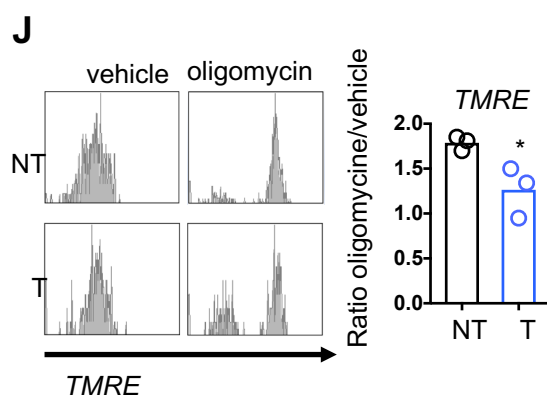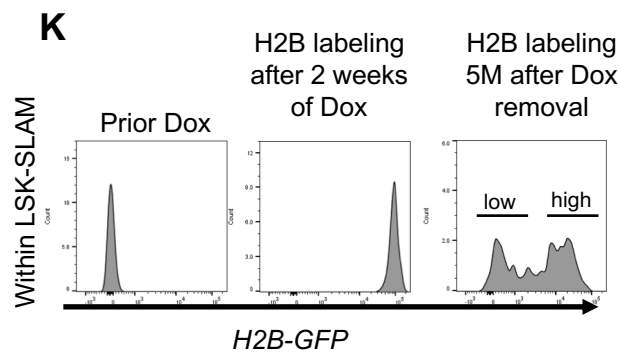

## Supplemental Figure 1 . Related to Figure 1

**A.** Representative flow chart of HSC identification by immunophenotype. HSC: cells are first gated on lineage negative cells (Lin<sup>-</sup>), then on c-Kit positive and Sca-1 positive cells (LSK), then on CD150 positive and CD48 negative (LSK-SLAM); ST-HSC: short-term HSC: (Lin<sup>-</sup>), then c-Kit positive and Sca-1 positive cells, then on CD150 negative and CD48 negative. MPP: multipotent progenitors: Lin<sup>-</sup> gate, then c-Kit positive and Sca-1 positive cells, then CD48 positive and CD150 negative; CP: committed progenitors: Lin<sup>-</sup>, then c-Kit positive and Sca-1 negative cells; hematopoietic stem and progenitors cells (HSPC): LSK-CD48<sup>-</sup>, Lin<sup>-</sup> gate, then c-Kit positive and Sca-1 positive cells, then CD48 negative cells

**B.** Quantification of mitochondrial parameters in WT mice treated with 5FU (150mg/kg) and analyzed at the indicated time and indicated population, mean±SD, n=6 mice in 2 independent experiments.

**C.** Quantification of TMRE in WT mice 5 month (5M) post 5FU (150mg/kg) challenge (mean±s.e.m, n=4 mice).

**D.** Representative images of Tom20 immunostaining in SLAM displayed as maximum intensity projection. Scale bar 5µm.

**E.** Mean Fluorescence Intensity of mito-Dendra2 levels in various population analyzed by flow cytometry. (mean±SD, n=6 mice in 2 independent experiments)

**F.** NT and T-SLAM were stained with TMRE and TMRE high vs low fractions were isolated; cells were then for Tom20. quantification of cells with dispersed versus compact mitochondrial organization (n=35 NT; n=36 T LK cells).

**G.** Representative images of transmission electron microscopy analysis of NT and T LK cells. Insert shows enlargement of one part of each cell. n=30 NT and 15 T cells.

**H.** Representative images of Tom20 immunostaining in LK displayed as alpha blending and quantification of cells with dispersed versus compact mitochondrial organization (n=76 NT LK cells; n=50 T LK cells). Scale bar 5µm.

**I.** TMRE quantification in NT and T HSPC after activation in culture for 24h with SCF+TPO; mean±SD, n=4 independent cultures.

**J.** Representative flow cytometry histogram and TMRE quantification in NT and T SLAM-HSC after oligomycin challenge. mean±SD, n=3 independent samples

**K.** Representative flow histogram showing levels of GFP labeled H2B within LSK-SLAM before doxycycline (left panel), two weeks after doxycycline treatment (middle panel) and then 5 months after dox removal (right panel). Note, SLAMs are fully labeled two weeks after doxycycline treatment, and the labeled is diluted 5 months after dox removal, indicative of SLAM division within this time frame.

All data are analyzed with unpaired T-Test \* p<0.05, \*\*p<0.01, \*\*\*p<0.001.

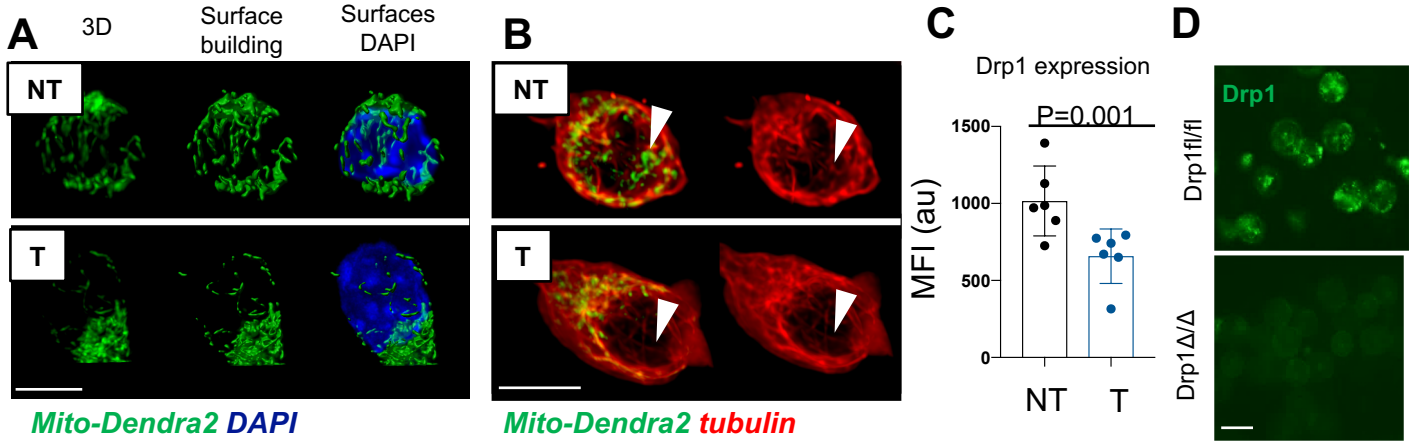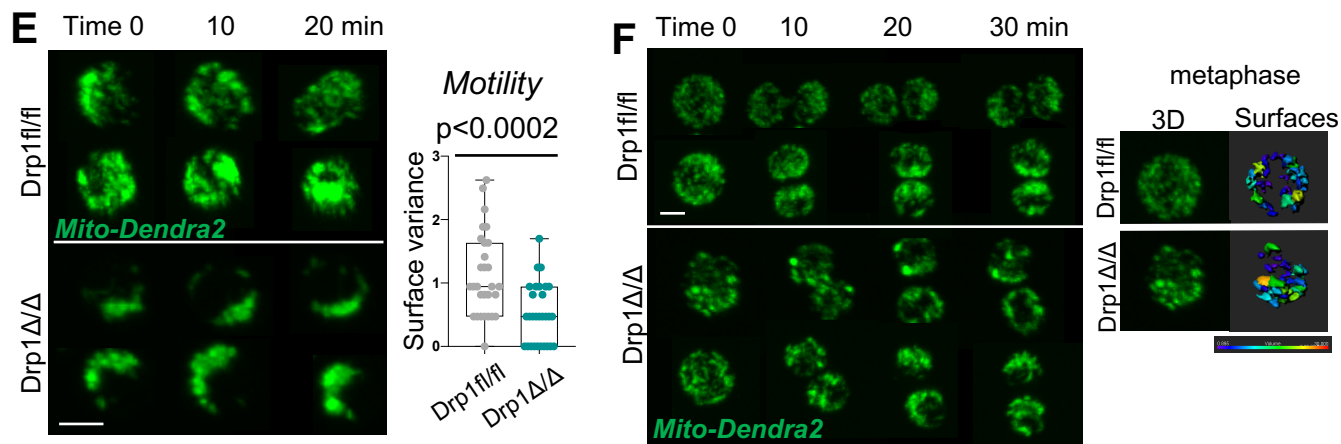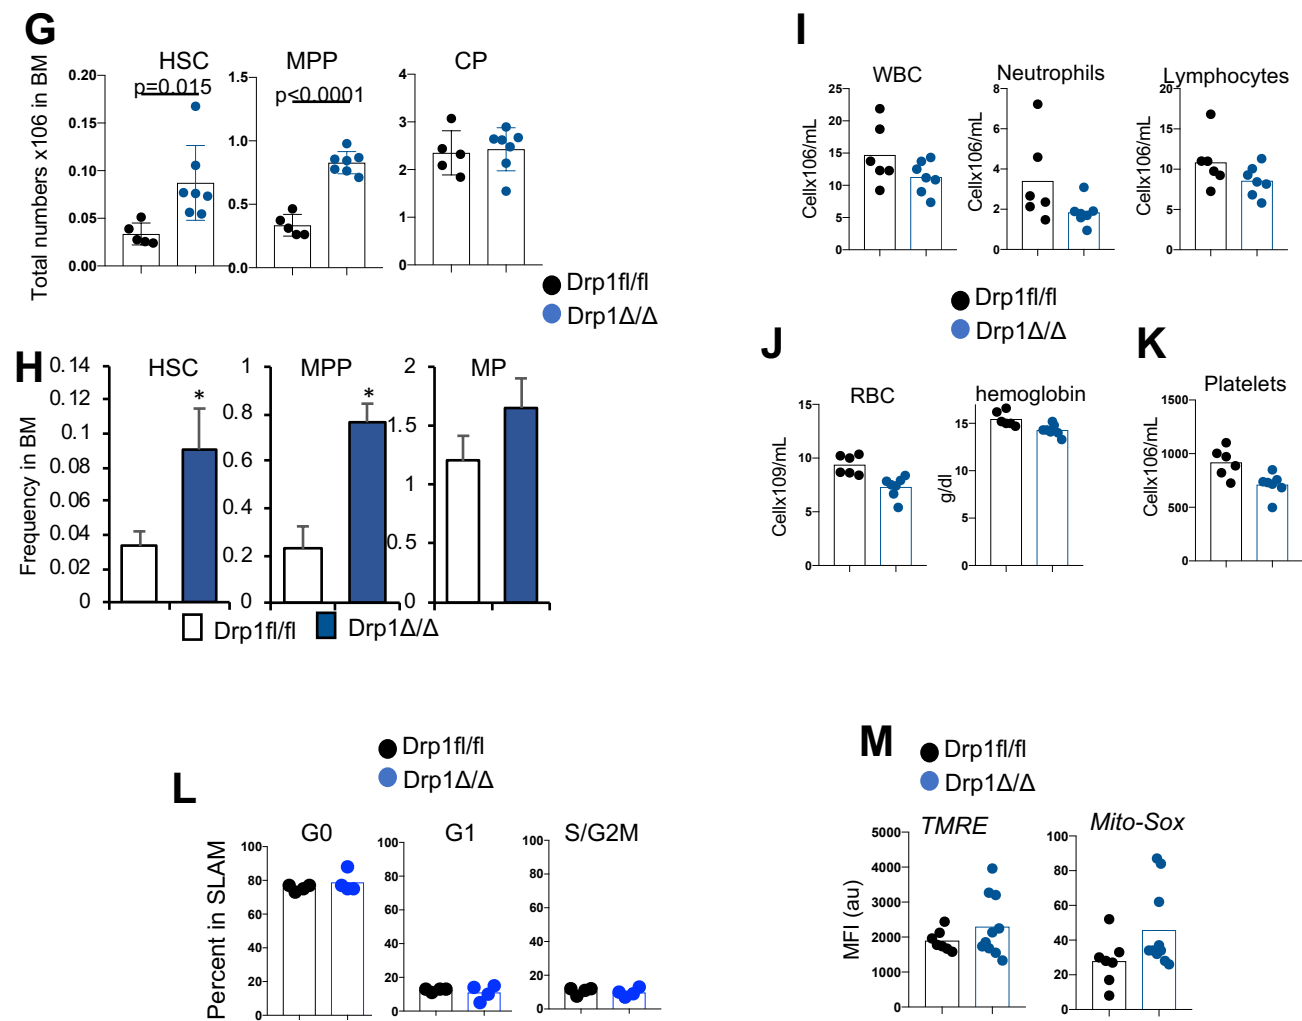

**Supplemental Figure 2 A-F: related to figure 2; G-M: related to figure 3**

**A.** Representative IF images of activated mito-Dendra2 NT SLAMs and mito-dendra2 signals identified by surface building algorithm in Imaris. Scale bar 5 $\mu$ m.

**B.** Representative images of mito-Dendra2 (in green) and tubulin (in red). Arrowhead points to microtubules. (n=25 to 30 cells). Scale bar 5 $\mu$ m.

**C.** Drp1 expression in NT and T SLAMs analyzed by flow cytometry (mean  $\pm$  SD, n=6 per group)

**D.** Representative IF images of Drp1 expression in Drp1fl/fl and Drp1 $\Delta/\Delta$  BM kit+ cells. Scale bar 10 $\mu$ m.

**E.** Mito-Dendra2-Drp1fl/fl and mito-Dendra2-Drp1 $\Delta/\Delta$  SLAM were imaged live during interphase after in vitro activation. Representative IF images of mitochondrial network during interphase at the indicated time interval. Mitochondria in green. Quantification of mitochondrial motility using variance of surfaces. Numbers of surfaces per cell per time points (3 time points over 30 minutes) were analyzed using Imaris surface building and variance of number of surfaces was calculated. Scale bar 5 $\mu$ m.

**F.** Mito-Dendra2-Drp1fl/fl and mito-Dendra2-Drp1 $\Delta/\Delta$  SLAM divisions were traced in vitro using live immunofluorescence imaging. Representative IF images of mitochondrial network in mito-Dendra2-Drp1fl/fl and mitoDendra2-Drp1 $\Delta/\Delta$  SLAMs during mitosis, scale bar 5 $\mu$ m. Mitochondria in green.

**G-K.** Analysis of Drp1 $\Delta/\Delta$  mice 4 months post Drp1 deletion. G-H. Total numbers and frequency of HSC and progenitors in BM (6 bones). n=5 Drp1fl/fl and 7 Drp1 $\Delta/\Delta$  mice. I-K. Blood parameters. n=10 Drp1fl/fl and 9 Drp1 $\Delta/\Delta$  mice

**L.** Cell cycle analysis using ki67 and Hoechst in Drp1fl/fl and Drp1 $\Delta/\Delta$  SLAMs 4M following Drp1 deletion, mean  $\pm$  SD, n=4 mice per group.

**M.** Quantification of TMRE and mitoSox in Drp1fl/fl and Drp1 $\Delta/\Delta$  SLAMs 4M following Drp1 deletion

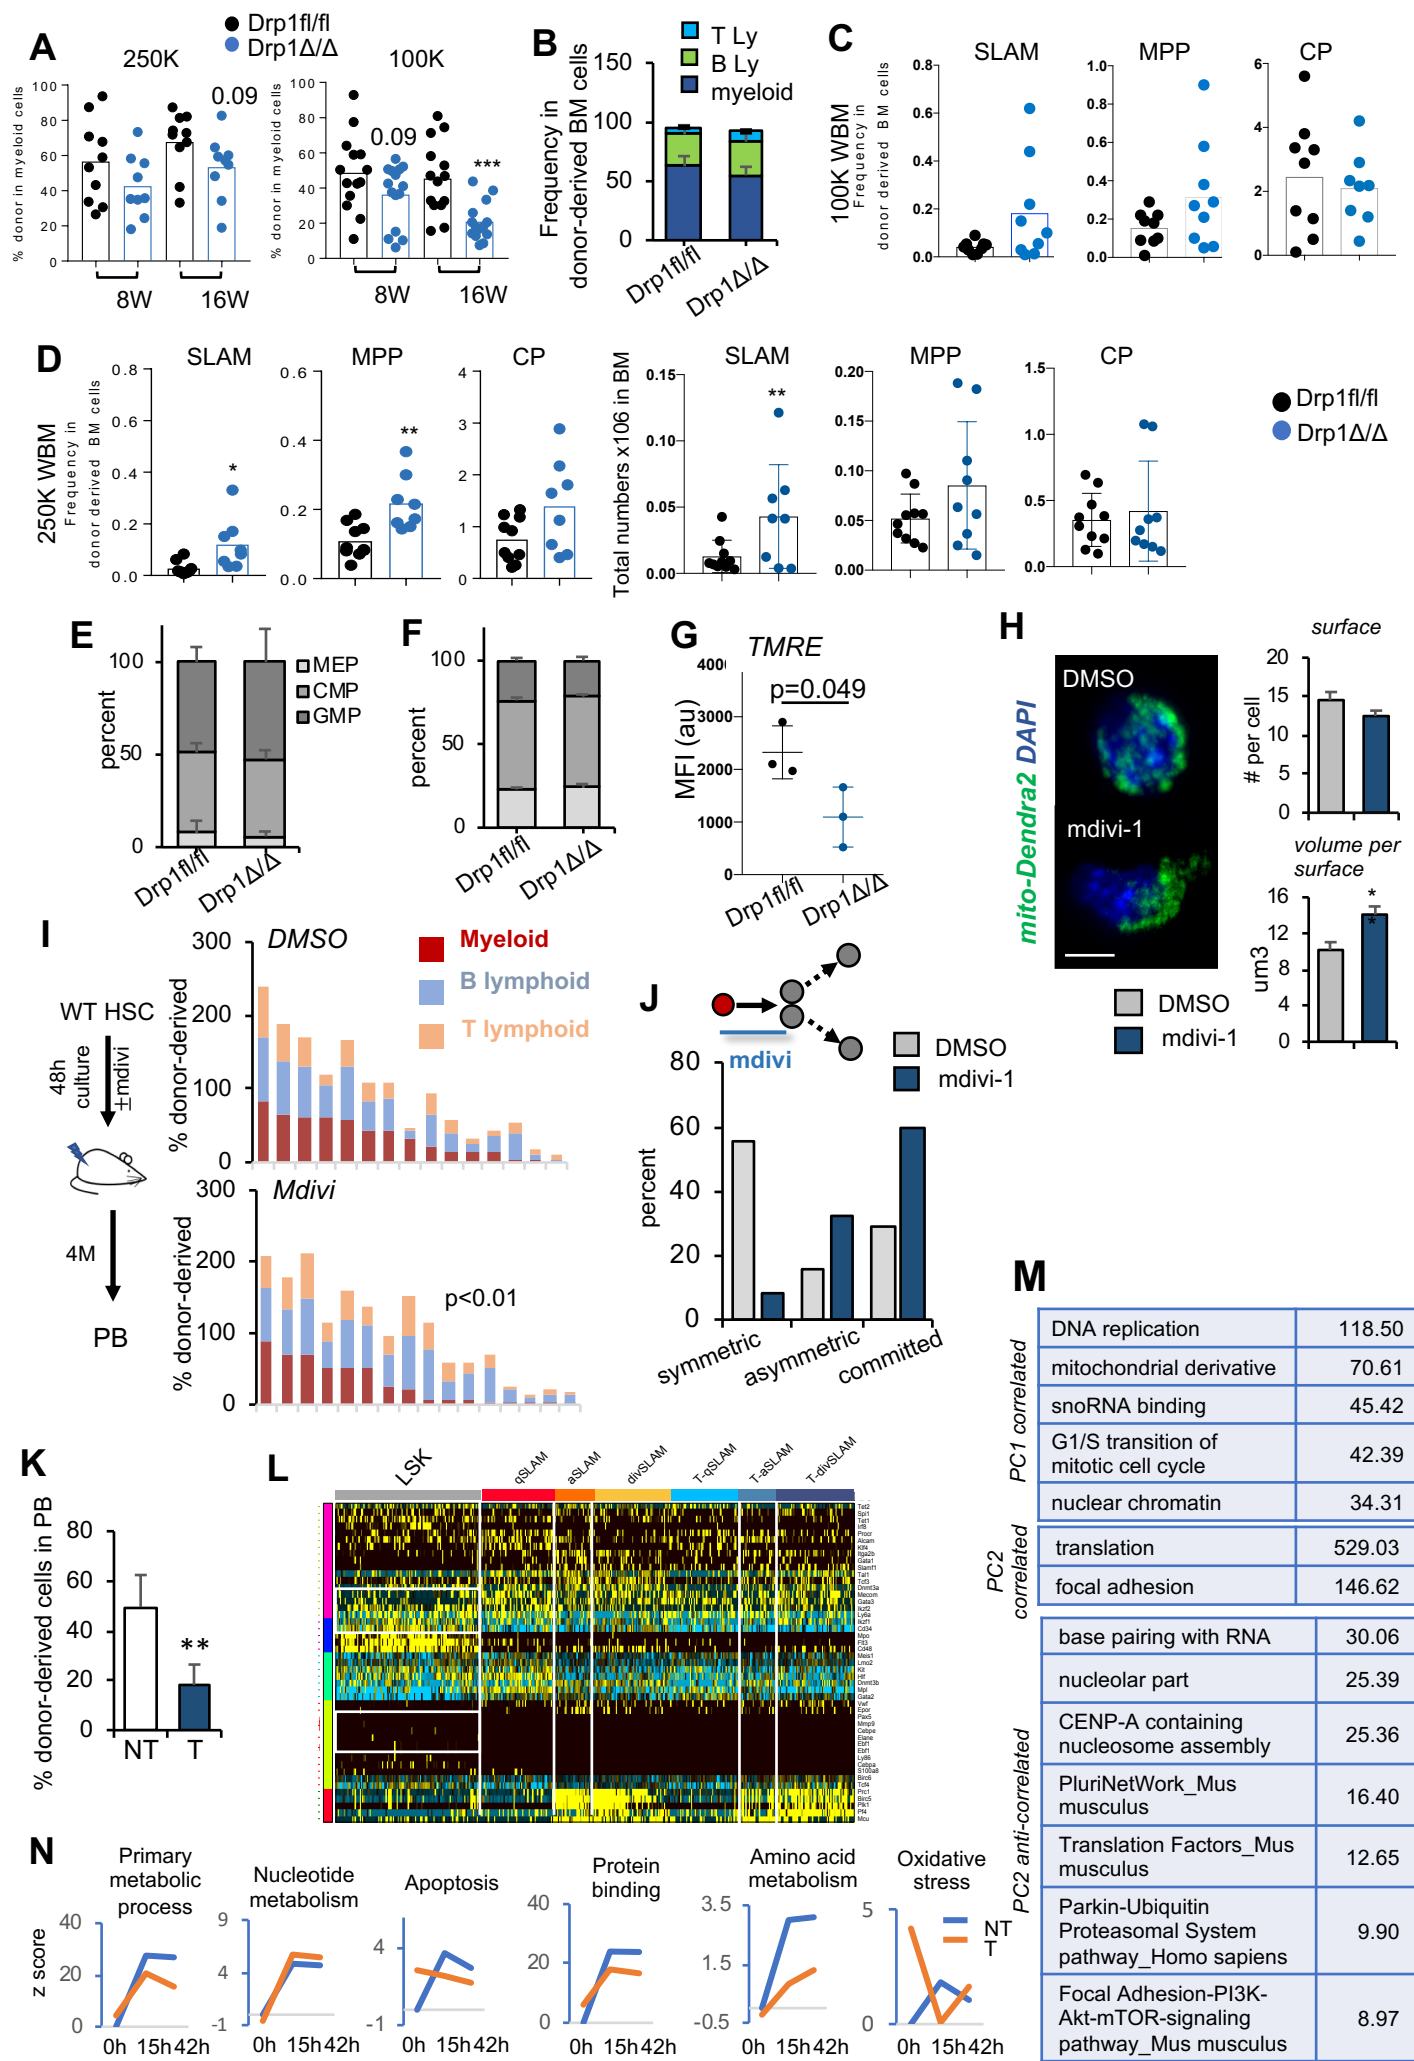

### Supplemental Figure 3; A-J: related to figure 3; K-N: related to figure 4

**A-F.** Competitive transplantation of Drp1fl/fl and Drp1 $\Delta/\Delta$  BM cells analyzed at 16 weeks following transplantation. Experiments were performed by transplanting 2 cell doses, 100,000 (100K) or 250,000 (250K) total BM cells into NSG mice. **A** frequency of donor-derived cells in PB; n=10 Drp1fl/fl and 9 Drp1 $\Delta/\Delta$  recipient mice for 250K; n=14 Drp1fl/fl and 14 Drp1 $\Delta/\Delta$  recipient mice for 100K. **B**, relative frequency of myeloid, B and T cells in BM. n=9 Drp1fl/fl and 8 Drp1 $\Delta/\Delta$  recipient mice for 250K; n=3 Drp1fl/fl and 4 Drp1 $\Delta/\Delta$  recipient mice for 100K. \* p<0.05, \*\*p<0.01, \*\*\*p<0.001. **C**. Dot plots show frequency of HSC and progenitors in BM (6 bones). n=9 Drp1fl/fl and 8 Drp1 $\Delta/\Delta$  recipient mice for 100K; **D** Dot plots show frequency and total numbers of SLAM, MPP and CP in BM. Bar graph shows frequency GMP, CMP and MEP within LK gate. n=9 Drp1fl/fl and 9 Drp1 $\Delta/\Delta$  recipient mice for 250K. \* p<0.05, \*\*p<0.01, \*\*\*p<0.001. **E**. Frequency GMP, CMP and MEP within LK gate, n=9 Drp1fl/fl and 8 Drp1 $\Delta/\Delta$  recipient mice for 100K. **F**. Frequency GMP, CMP and MEP within LK gate, n=9 Drp1fl/fl and 9 Drp1 $\Delta/\Delta$  recipient mice for 250K. **G**. Quantification of mitochondrial TMRE levels in Drp1fl/fl and Drp1 $\Delta/\Delta$  HSPC after treatment with mitochondrial complex I inhibitor, rotenone (1 $\mu$ M). mean  $\pm$  SD, n=3 mice per group, unpaired T-Test. **H**. NT SLAMs were treated in vitro with mdivi for 24h. Representative images of eGFP-mitoDendra2 HSC. Quantification of number of mitochondrial surfaces and volume per surface using Imaris surface building as in figure 2. mean  $\pm$  SD, n= 50 cells per group. Scale bar 5 $\mu$ m. **I**. NT SLAMs were treated in vitro with or without mdivi for 2 days and then used competitive transplant, stacked bar graphs are donor chimerism (CD45.2+) in each PB lineages (myeloid, B lymphocytes and T lymphocytes) from individual transplanted mice at 16 weeks post-transplantation. We calculated the ratio of donor contribution to myeloid, B and T cells in each mouse, and classified the reconstitution as myeloid-dominant, balanced or lymphoid-dominant; chi-square test indicates frequency of mice with durable myeloid reconstitution is different between the groups. **J**. In vitro paired-daughter cell assay. Single SLAMs from NT mice were treated in vitro with or without mdivi for 48h. Percent of multilineage myeloid differentiation potential of daughter cells after separation was calculated and data show frequency of symmetric division (each daughter cell gave rise to a multipotent clones), asymmetric division (only one daughter cell is multipotent) and committed division (none of the daughter cells are multipotent) (see Supplemental Fig.) n=38-70 single cells; exact fisher test. **K**. H2B-eGFP<sup>+</sup> LSK-SLAM isolated from non-transplanted or transplanted mice were cultured for the duration of one division in SCF+TPO and used for transplantation. percent donor-derived chimerism in the peripheral blood 4 months after transplantation. Mean SD, n=6 mice \*\*p<0.01. **L**. Heatmap of selected genes in each population from scRNA-Seq data (n=251 cells). Columns represent cells. Rows represent genes. **M**. Tables are top gene ontology category of differentially expressed genes represented in PC1 and PC2 shown in figure 4 panel C, analyzed using EnrichR. **N**. Differential gene expression of each group of cells was compared to qSLAM. Graphs are z-scores of indicated GO category.

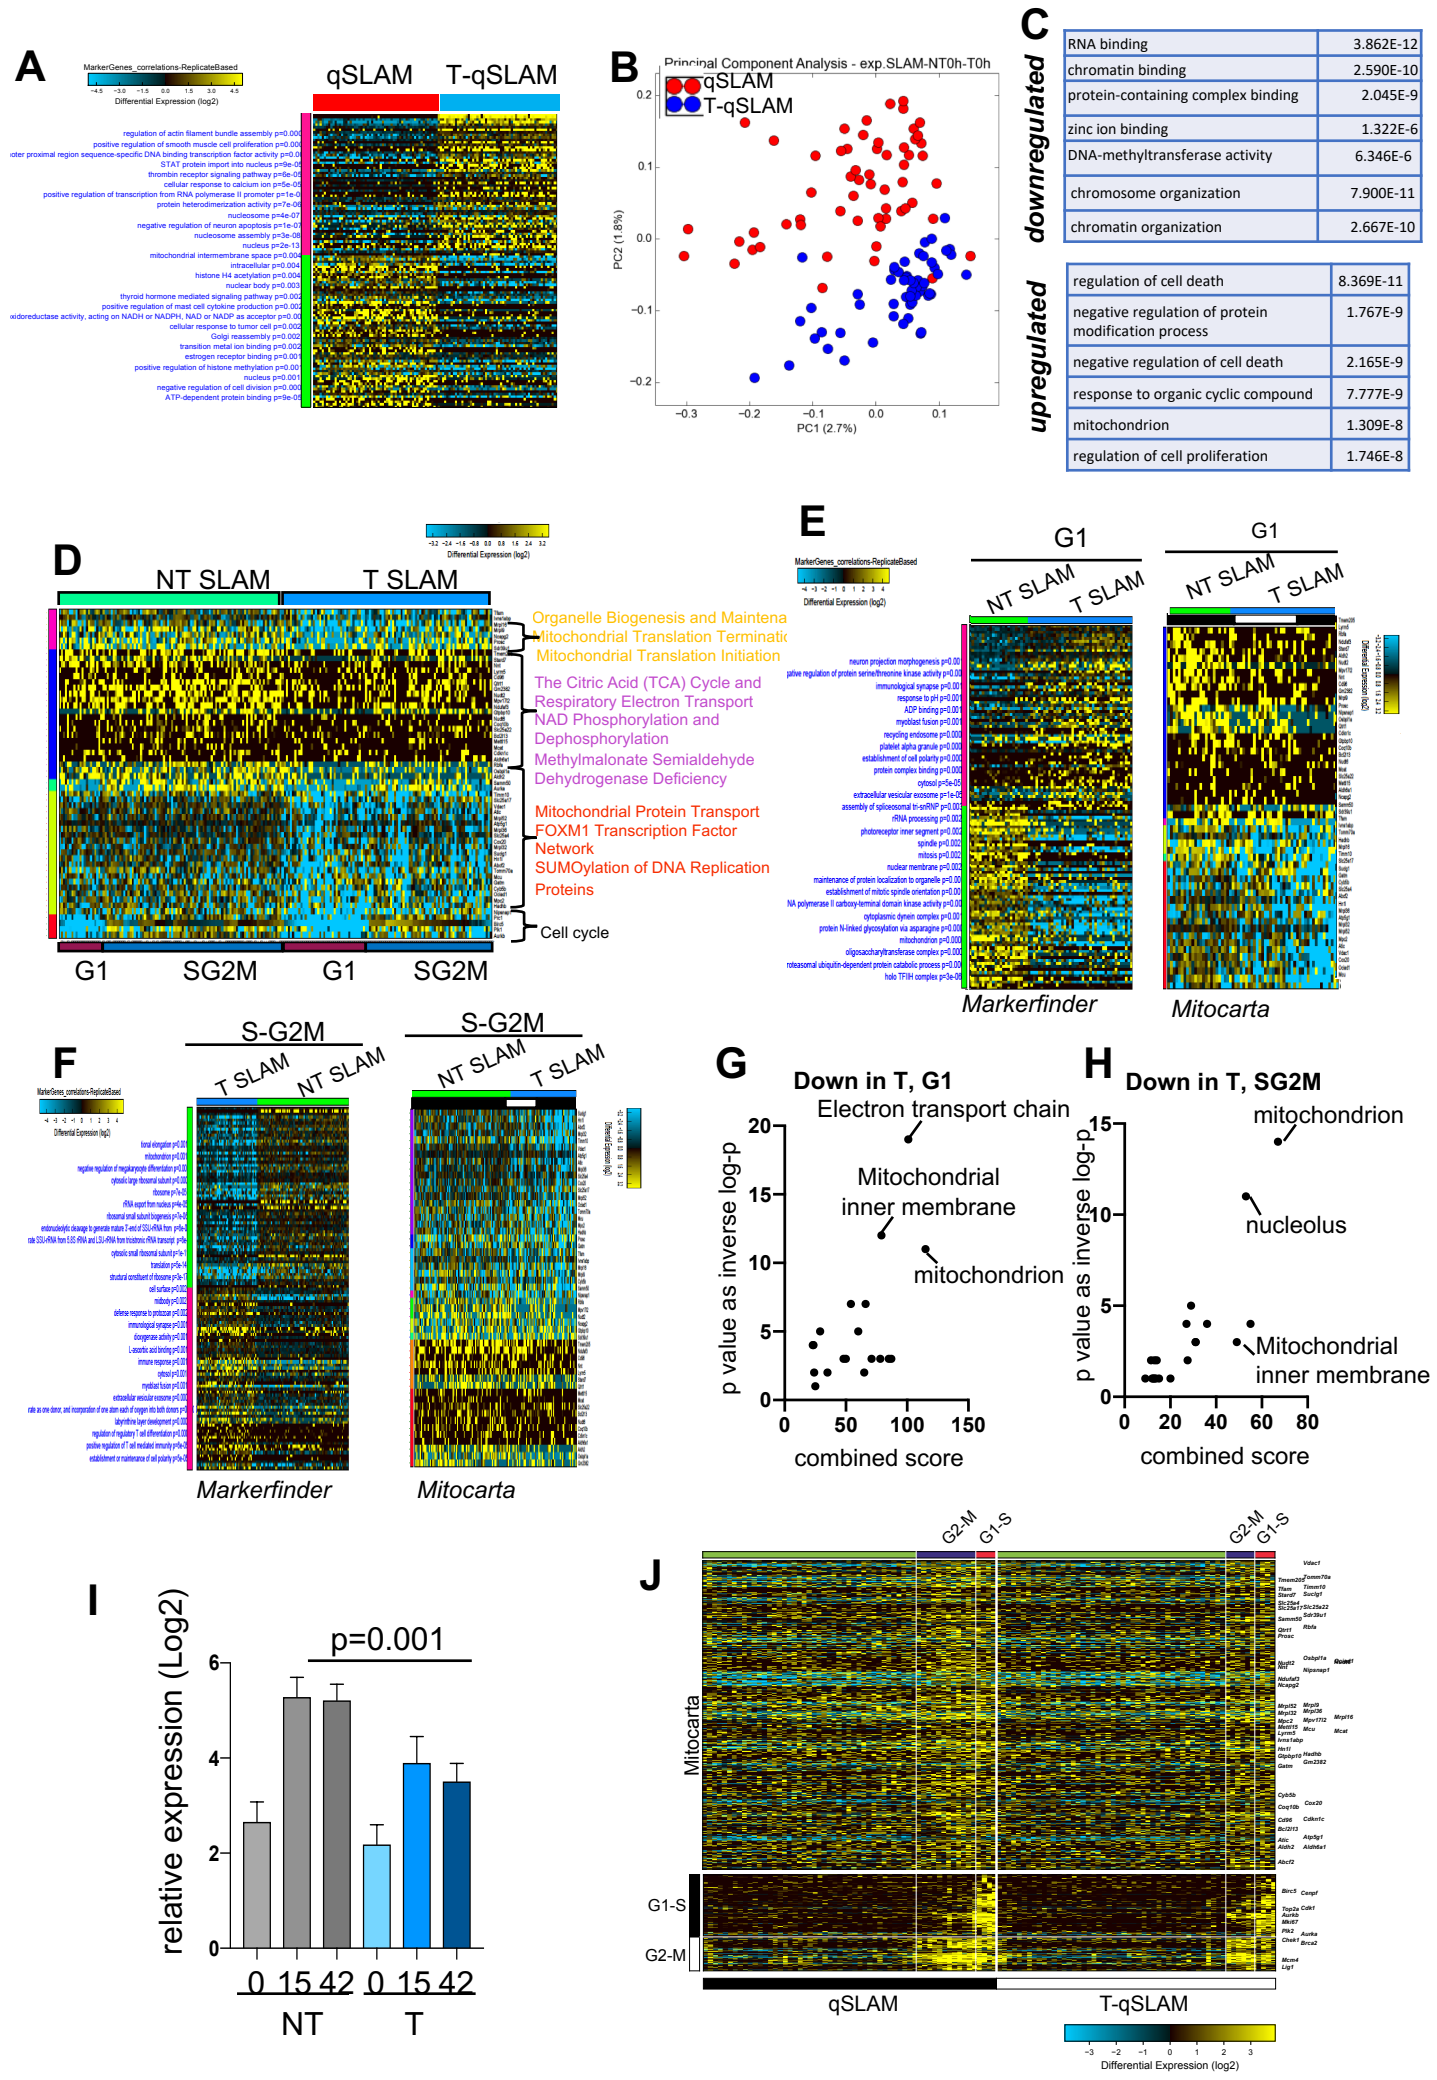

#### **Supplemental Figure 4, related to figure 4**

- A.** Hierarchical clustering of differentially expressed genes in indicated population identified by Markerfinder in Altanalyze.see TableS1
- B,** PCA visualization of indicated cells.
- C.** Tables are top gene ontology category of differentially expressed genes represented in PC1 of panel b, analyzed using EnrichR.
- D.** Hierarchical clustering of differentially expressed cell cycle and mitochondrial genes in activated NT and T SLAMs. Cells were segregated based on their cell cycle status, which was identified in AltAnalyze. Coincident expression of nuclear-encoded genes important for mitochondria are shown.
- E.** Left panel is Hierarchical clustering of differentially expressed genes in indicated population identified to be in G1 analyzed by Markerfinder in Altanalyze. Right panel is hierarchical clustering of differentially expressed nuclear encoded mitochondrial genes shown as Mitocarta.
- F.** Left panel is Hierarchical clustering of differentially expressed genes in indicated population identified to be in SG2M analyzed by Markerfinder in Altanalyze. Right panel is hierarchical clustering of differentially expressed nuclear encoded mitochondrial genes shown as Mitocarta.
- G.** Z score per inverted log-p values of top gene ontology category of downregulated genes in T-SLAMs in G1
- H.** Z score per inverted log-p values of top gene ontology category of downregulated genes in T-SLAMs in SG2M
- I.** mRNA expression of Drp1 extracted from scRNA data. (Mean SD, n=30-60 cells per group)
- J.** Hierarchical clustering of differentially expressed cell cycle and mitochondrial genes in freshly isolated SLAM-HSC from naïve [qSLAM] and transplanted animals [T-qSLAM]. Cells were segregated based on their cell cycle status, which was identified in AltAnalyze using G1-S and G2M cell cycle phase gene expression. Coincident expression of nuclear-encoded genes important for mitochondria are shown as 'Mitocarta'.see Table S1
